# Supplementary material for: Atmospheric Effects of Magnetosheath Jets
Source: MDPI journal article supplement (doi:10.3390/atmos14010045), 2022-12-26
Supplement: s1 [file s1]

Archive with 1 entries (1 files):
- atmosphere-2079343-supplementary.pdf
